# Supplementary material
Source: publisher figshare collection journal article supplement (https://sage.figshare.com/ndownloader/files/14427569)
Supplement: Supplementary file 1 [file 14427569]

# Opening the Black Box of Finance: North-South Investment, Political Risk, and U.S. Military Intervention

Supplementary Materials\*

---

\*The dataset, replication code, and supplementary materials are available onto the journal's online platform and from [michael.lee@hunter.cuny.edu](mailto:michael.lee@hunter.cuny.edu).

## ARIMA results

In order to develop an index of exposure to the Global South and the Global North, we ran ARIMA regressions of the stock price of every company in our dataset using the overall fluctuations of the S&P 500, the Templeton Emerging Markets fund, and our weighted blend of a European and Japanese mutual fund (developed world index).

Let us walk through a few examples in order to illustrate how our firm exposure variables were developed. First, let's consider FleetBoston, a company with a fair deal of exposure to the developing world (Model I in Table A1). In the ARIMA regression for FleetBoston, the Z-statistic for Templeton Emerging Markets was 1.87, implying that FleetBoston stock prices had a positive, weakly significant relationship with the Templeton Emerging Markets fund. In contrast, the Z-statistic for our developed world index was only 0.65. Hence, we would consider FleetBoston to be a company with some exposure to the Global South, but with much less exposure to the Global North.

First American Corporation (Model II in Table A1), on the other hand, displayed negative exposure to the Global South (with a Z-statistic of -3.24), implying that its stock tended to do poorly when the Templeton Emerging Market fund performed well. First American also had a negative Z-statistic with respect to our developed world index, although the strength of the relationship was much weaker. Finally, JP Morgan Chase (Model III in Table A1), a large investment bank, had positive exposure to the Global North, with a Z-statistic of 2.54. JP Morgan was less exposed to the Global South, however, with a negligible Z-statistic of -.02.

TABLE A1: Z-statistics from regression of FleetBoston, First American, and Chase (2001-2002) stock prices on Templeton Emerging Markets and the S&P 500 Index

|                                                                           | (I)                      | (II)                      | (III)                    |
|---------------------------------------------------------------------------|--------------------------|---------------------------|--------------------------|
|                                                                           | FleetBoston              | First American            | JP Morgan Chase          |
| Templeton                                                                 | 0.287*( <b>1.87</b> )    | -0.583***( <b>-3.24</b> ) | -0.003( <b>-0.02</b> )   |
| S&P Index                                                                 | 0.032***( <b>13.49</b> ) | 0.015***( <b>6.27</b> )   | 0.044***( <b>14.88</b> ) |
| Developed world index                                                     | 2.047 ( <b>0.65</b> )    | -0.464 ( <b>-0.18</b> )   | 13.670* ( <b>2.54</b> )  |
| Constant                                                                  | -6.473**(-3.05)          | 10.415*** (3.61)          | -23.532***(-6.60)        |
| AR(1)                                                                     | 0.963*** (65.56)         | 0.990*** (145.49)         | 0.957*** (46.01)         |
| sigma                                                                     | 0.564*** (20.74)         | 0.526*** (12.80)          | 0.698*** (22.90)         |
| AIC                                                                       | 862.603                  | 792.999                   | 1074.967                 |
| N                                                                         | 500                      | 500                       | 500                      |
| Coefficients with Z-statistics in parentheses; ***p<.001; **p<.01; *p<.05 |                          |                           |                          |

## The pro-finance index

The *pro-finance* index captures how members of Congress voted on the issues most salient to financial firms. Specifically, this index includes votes supporting bailouts, lower taxes on capital (particularly corporate taxes, capital gains taxes, and estate taxes), and reductions in the financial regulatory burden. In constructing the index, we selected votes that were high-impact, that were specifically related to finance issues, and that were contentious. A number of important votes did not fit these criteria. For instance, three of the most important bills regulating finance (the 1994 Neal-Riegle branching bill, the 2000 Commodity Futures Modernization Act, and Sarbanes-Oxley in 2002) passed by voice vote or were nearly unanimous. Similarly, many budget votes included a range of issues irrelevant to finance. In such circumstances, we looked for more relevant or more specific amendments proposed in Congress. For example, the McDermott motion regarding capital gains tax captures op-

position to capital gains cuts more directly than the budget bill of that year. Alternately, the Lafalce Amendment to Sarbanes-Oxley proposed a more stringent regulatory approach, allowing us to distinguish better between pro-regulation and anti-regulation Congress members. Some measures that were contentious in the House were passed with unanimity in the Senate; hence, we focused on fewer votes in the latter chamber. The votes included in the pro-finance index are listed in Table A2 below.

TABLE A2a: Votes included in index for *pro-finance* leaning House members

| Objective of the vote                                                                                               | Interpretation of ‘yea’ vote | Date of vote |
|---------------------------------------------------------------------------------------------------------------------|------------------------------|--------------|
| Banking reform (allowing branching, extending FDIC coverage)                                                        | Pro-finance                  | 14/11/1991   |
| Resolution trust corporation (savings & loans bailouts)                                                             | Pro-finance                  | 14/09/1993   |
| Shareholder lawsuits veto override (overrode veto of law allowing ignorance as a defence for securities fraud)      | Pro-finance                  | 20/12/1995   |
| HR 10 (bill ending Glass-Steagall, precursor to Gramm-Leach-Bliley)                                                 | Pro-finance                  | 13/05/1998   |
| McDermott motion (expressed disagreement with capital gains cut on property held for >1 year)                       | Anti-finance                 | 25/06/1998   |
| Financial Services Modernization Act (ended Glass-Steagall)                                                         | Pro-finance                  | 01/07/1999   |
| Estate Tax Relief (lowered estate tax)                                                                              | Pro-finance                  | 24/04/2001   |
| Economic stimulus (business tax cuts, reduction in capital gains tax from 20% to 18%, elimination of corporate AMT) | Pro-finance                  | 24/10/2001   |
| Lafalce Amendment (amendment to Sarbanes-Oxley to create public regulator able to set auditing standards)           | Anti-finance                 | 24/04/2002   |

TABLE A2b: Votes included in index for *pro-finance* leaning Senate members

| Objective of the vote                                                                   | Interpretation of ‘yea’ vote | Date of vote |
|-----------------------------------------------------------------------------------------|------------------------------|--------------|
| Financial Services Modernization Act<br>(repealed Glass-Steagall)                       | Pro-finance                  | 06/05/1999   |
| Taxpayer Refund Act<br>(included capital gains taxes)                                   | Pro-finance                  | 30/07/1999   |
| Economic Growth and Tax Relief<br>(Bush Jr. tax cuts)                                   | Pro-finance                  | 23/05/2001   |
| Death Tax Elimination Act of 2001<br>(proposed to permanently eliminate the estate tax) | Anti-finance                 | 12/06/2002   |

## Robustness checks

Below, we present some robustness tests in which: a) we exclude three highly-correlated variables, *party*, *ideology*, and *pro-finance*; b) we include an additional variable, New York City effect; and, c) we exclude the *interventionism* covariate.

### a) Results without *party*, *ideology*, and *pro-finance*

In the manuscript, we contend that there are strong theoretical reasons to include *party* in our main specification; however, some may argue that this variable is not central to the theoretical argument. Eliminating the *party* covariate produced substantively similar results (Table A3, Model 7, for the Senate and Table A4, Model 10, for the House), although *ideology* became strongly statistically significant for the House (which means that House conservatives receive substantially fewer donations). It is worth mentioning that removing *party* slightly worsens the fit of our Senate model (relative to the full model) with an AIC score of 16801.78 versus a baseline of 16797.52.

Models 8 and 11 present the results without the *ideology* variable.<sup>1</sup> The findings remain robust to the exclusion of this covariate as well. Leaving *ideology* out of the model produced AICs slightly above the baseline.

Models 9 and 12 present the results without the *pro-finance* variable. Again, the findings remain similar, although *ideology* became insignificant and *party* became weakly significant for the House specification. Note, however, that exclusion of *pro-finance* produces a worse fit (relative to the full model). Hence, in addition to having sound theoretical reasons for including this variable in the main specification (Model 3 in the main manuscript), we also have reasons to believe that its inclusion provides a better fit for the data.

---

<sup>1</sup>The correlation between *party* and *ideology* stands at .944.

TABLE A3: Results without *party*, *ideology*, and *pro-finance* (Senate)

|                                                            | Model 7               | Model 8               | Model 9               |
|------------------------------------------------------------|-----------------------|-----------------------|-----------------------|
| <i>North-South exp.</i>                                    | 472.572***(106.020)   | 473.622***(105.900)   | 474.151***(105.966)   |
| <i>North-North exp.</i>                                    | 410.448***(94.887)    | 411.881***(94.814)    | 473.510***(106.039)   |
| <i>interventionism</i>                                     | 3330.946***(566.990)  | 2983.241***(566.308)  | 3104.919***(563.859)  |
| <b><i>North-South exp.</i> × <i>interv.</i></b>            | 1059.070*(504.102)    | 1063.138*(503.287)    | 1041.111*(502.803)    |
| <i>ideology</i>                                            | 125.244(656.123)      |                       | 2527.226**(800.441)   |
| <i>party (Republican=1)</i>                                |                       | -600.234(398.918)     | -1333.598*(585.665)   |
| <i>leadership</i>                                          | 2306.462***(498.356)  | 2316.970***(496.363)  | 2154.193***(496.328)  |
| <i>committee</i>                                           | 1874.635***(214.331)  | 1855.315***(213.865)  | 1756.956***(216.960)  |
| <i>pro-finance</i>                                         | 656.834(518.613)      | 1274.175**(432.071)   |                       |
| <i>seniority</i>                                           | -92.035***(12.386)    | -84.867***(12.650)    | -86.611***(12.588)    |
| <i>elections 2002</i>                                      | 4471.999***(247.761)  | 4454.050***(247.202)  | 4501.426***(247.277)  |
| Constant                                                   | -7314.268***(343.521) | -7042.974***(379.802) | -6754.443***(410.581) |
| sigma_e                                                    | 4921.111***(195.136)  | 4918.108***(166.257)  | 4920.653***(166.342)  |
| N                                                          | 6500                  | 6500                  | 6500                  |
| AIC                                                        | 16801.18              | 16798.95              | 16797.54              |
| Standard errors in parentheses; ***p<.001; **p<.01; *p<.05 |                       |                       |                       |

TABLE A4: Results without *party*, *ideology*, and *pro-finance* (House)

|                                                                   | Model 10               | Model 11               | Model 12               |
|-------------------------------------------------------------------|------------------------|------------------------|------------------------|
| <i>North-South exp.</i>                                           | 837.131*** (59.628)    | 838.050*** (59.652)    | 840.597*** (59.751)    |
| <i>North-North exp.</i>                                           | 72.747 (50.047)        | 71.218 (50.067)        | 70.087 (50.118)        |
| <i>interventionism</i>                                            | 244.969 (263.325)      | 127.651 (264.657)      | 536.516 (254.334)      |
| <b><i>North-South exp.</i> <math>\times</math> <i>interv.</i></b> | 620.258* (262.922)     | 615.524* (261.494)     | 611.355* (261.053)     |
| <i>ideology</i>                                                   | -671.129*** (183.513)  |                        | 639.282 (329.888)      |
| <i>party (Republican=1)</i>                                       |                        | -788.687*** (169.893)  | -571.211 (310.850)     |
| <i>leadership</i>                                                 | 1575.868*** (389.156)  | 1593.740*** (389.059)  | 1487.883*** (389.595)  |
| <i>committee</i>                                                  | 1318.113*** (124.851)  | 1338.066*** (125.113)  | 1359.024*** (125.653)  |
| <i>pro-finance</i>                                                | 1320.720*** (264.883)  | 1512.185*** (263.079)  |                        |
| <i>seniority</i>                                                  | 5.901 (8.269)          | 7.357 (8.250)          | 7.729 (8.266)          |
| Constant                                                          | -6835.556*** (228.919) | -6501.656*** (234.574) | -6666.568*** (256.896) |
| sigma_e                                                           | 3542.331*** (166.395)  | 3541.204*** (103.864)  | 3552.078* (1603.987)   |
| N                                                                 | 28600                  | 28600                  | 28600                  |
| AIC                                                               | 24122.72               | 24114.42               | 24145.03               |
| Standard errors in parentheses; ***p<.001; **p<.01; *p<.05        |                        |                        |                        |

## b) Results with a New York City variable (*nyc*)

Some may suggest that the 9/11 attacks had a unique impact on representatives from NYC. Representing constituencies with above average employment in the financial services industry, we might expect New York senators and House members to receive greater donations from the financial sector. At the same time, 9/11 might have made those members of Congress more interventionist/‘hawkish’ (although we note that our measure of interventionism/‘hawkishness’ also includes votes before 2001). To control for a possible 9/11 effect, we coded all members of Congress from NYC (plus bordering districts in New Jersey and Connecticut) with a 1 and non-New York districts with a 0. Table A5 reveals that the six senators from NY, NJ, and CT did not receive a significant boost on donations. However, House members from NY, NJ, and CT received a statistically significant increase in donations from financial companies (Model 14). It is also worth pointing out that the inclusion of the NYC variable did not substantially change the signs of the other variables for the House models. The NYC variable also improved overall model fit for the House model.



TABLE A5: Results with the *nyc* variable

|                                                            | Model 13 (Senate)     | Model 14 (House)      |
|------------------------------------------------------------|-----------------------|-----------------------|
| <i>North-South exp.</i>                                    | 474.080***(105.939)   | 836.617***(59.582)    |
| <i>North-North exp.</i>                                    | 411.586***(94.829)    | 70.559(50.029)        |
| <i>interventionism</i>                                     | 2913.435***(588.242)  | 132.278(264.718)      |
| <b><i>North-South exp. × interv.</i></b>                   | 1044.440*(501.922)    | 610.976*(261.344)     |
| <i>ideology</i>                                            | 1882.505(974.868)     | 284.079(340.830)      |
| <i>party (Republican=1)</i>                                | -1422.354*(587.874)   | -930.866**(315.664)   |
| <i>leadership</i>                                          | 2238.000***(498.601)  | 1604.017***(388.588)  |
| <i>committee</i>                                           | 1754.508***(219.819)  | 1282.093***(125.962)  |
| <i>pro-finance</i>                                         | 709.416(520.318)      | 1441.314***(270.773)  |
| <i>seniority</i>                                           | -83.837***(12.686)    | 8.807(8.328)          |
| <i>elections 2002</i>                                      | 4477.510***(248.232)  |                       |
| <i>nyc</i>                                                 | 273.752(439.344)      | 797.365***(214.875)   |
| Constant                                                   | -6429.698***(400.699) | -6483.968***(255.153) |
| sigma_e                                                    | 4946.053***(167.321)  | 3515.293(221879)      |
| N                                                          | 6500                  | 28600                 |
| AIC                                                        | 16799.13              | 24104.95              |
| Standard errors in parentheses; ***p<.001; **p<.01; *p<.05 |                       |                       |

### c) Results without the *interventionism* variable

A candidate's *interventionism* is central to our theoretical argument and to the construction of the independent variable. In Table A6, we show results without this variable (and, accordingly, without the interaction term) for illustrative purposes only. We do so to show that removing the *interventionism* covariate worsens the fit of the main model, and to expose any potential collinearities after the removal of *interventionism*.

TABLE A6: Results without the *interventionism* variable

|                                                            | Model 15 (Senate)     | Model 16 (House)      |
|------------------------------------------------------------|-----------------------|-----------------------|
| <i>North-South exp.</i>                                    | 506.349***(105.711)   | 845.747***(59.697)    |
| <i>North-North exp.</i>                                    | 414.982***(95.137)    | 71.372(50.090)        |
| <i>interventionism</i>                                     |                       |                       |
| <b><i>North-South exp. × interv.</i></b>                   |                       |                       |
| <i>ideology</i>                                            | 1660.251(961.167)     | 167.502(338.295)      |
| <i>party (Republican=1)</i>                                | -2142.770***(571.331) | -977.163**(315.664)   |
| <i>leadership</i>                                          | 2005.774***(494.742)  | 1608.117***(125.314)  |
| <i>committee</i>                                           | 1874.815***(218.409)  | 1350.418***(125.314)  |
| <i>pro-finance</i>                                         | 1060.225*(522.468)    | 1560.347***(260.886)  |
| <i>seniority</i>                                           | -79.902***(12.481)    | 6.391(8.217)          |
| <i>elections 2002</i>                                      | 4518.806***(249.086)  |                       |
| Constant                                                   | -6727.640***(409.921) | -6414.968***(250.911) |
| sigma_e                                                    | 4916.191***(194.863)  | 3538.291(648450)      |
| N                                                          | 6500                  | 28600                 |
| AIC                                                        | 16826.90              | 24118.89              |
| Standard errors in parentheses; ***p<.001; **p<.01; *p<.05 |                       |                       |

## List of financial firms included in the dataset

TABLE A7: Fortune 500 Financial PACs included in the study (as legislator-PAC dyads)

|                          |                                 |                               |
|--------------------------|---------------------------------|-------------------------------|
| Aetna                    | Countrywide Financial           | Morgan Stanley                |
| AFLAC                    | Fannie Mae                      | NationalCity Corp             |
| AIG                      | Fidelity National Financial     | Nationwide Financial Services |
| Allmerica Financial      | Fifth Third Bancorp             | Northern Trust Corp           |
| Allstate                 | First American Corporation      | Oxford Health Plans           |
| American Express         | FleetBoston Financial           | PNC Financial Services        |
| American Financial Group | Freddie Mac                     | Principal Financial           |
| AmSouth Bancorp          | Goldman Sachs Group             | Providian Financial           |
| Aon                      | Hartford Financial Services     | Prudential Financial          |
| Bank of America Corp     | Health Net                      | Regions Financial             |
| Bank of New York Co      | Host Marriot                    | SouthTrust Corp               |
| Bank One Corp            | Household International         | St. Paul Travelers Cos        |
| BB&T Corp                | Humana                          | State Street Corporation      |
| Bear Stearns             | Jefferson-Pilot                 | SunTrust Corp                 |
| Capital One Financial    | John Hancock Financial Services | Union Planters Corporation    |
| Charles Schwab           | KeyCorp                         | UnitedHealth Group            |
| Chase Manhattan Corp     | Lehman Bros                     | UnumProvident                 |
| Chubb Corporation        | Lincoln National                | US Bancorp                    |
| Cigna                    | MBNA                            | Wachovia                      |
| Citigroup                | Mellon Financial Corporation    | Washington Mutual             |
| Comerica                 | Merrill Lynch                   | Wellpoint                     |
| Conseco                  | MetLife                         | Wells Fargo                   |

## List of House members included in the dataset

TABLE A8: Members of Congress included in the study (as legislator-PAC dyads)

|                         |                              |                        |
|-------------------------|------------------------------|------------------------|
| Abercrombie, Neil       | Berman, Howard L.            | Burr, Richard M.       |
| Ackerman, Gary L.       | Berry, Marion                | Burton, Danny L.       |
| Aderholt, Robert B.     | Biggert, Judy                | Buyer, Steven          |
| Akin William T.         | Bilirakis, Michael           | Callahan, Herbert L.   |
| Allen Thomas H.         | Bishop, Sanford D. Jr.       | Calvert, Kenneth S.    |
| Andrews, Robert E.      | Blagojevich, Rod             | Camp, David L.         |
| Armey, Richard K.       | Blumenauer, Earl             | Cannon, Christopher B. |
| Baca, Joe               | Blunt, Roy                   | Cantor, Eric           |
| Bachus, Spencer T.      | Boehlert, Sherwood L.        | Capito, Shelley M.     |
| Baird, Brian            | Boehner, John A.             | Capps, Lois            |
| Baker, Richard H.       | Bonilla, Henry               | Capuano, Michael E.    |
| Baldacci, John E.       | Bonior, David E.             | Cardin, Benjamin L.    |
| Baldwin, Tammy          | Bono, Mary                   | Carson, Brad           |
| Ballenger, Thomas C.    | Boozman, John N.             | Carson, Julia          |
| Barcia, James A.        | Borski, Robert A.            | Castle, Michael N.     |
| Barr, Robert L. Jr.     | Boswell, Leonard L.          | Chabot, Steven J.      |
| Barrett, Thomas M.      | Boucher, Frederick C. “Rick” | Chambliss, Saxby       |
| Bartlett, Roscoe G. Jr. | Boyd, F. Allen Jr.           | Clay, William L. Jr.   |
| Barton, Joe L.          | Brady, Kevin P.              | Clayton, Eva M.        |
| Bass, Charles F.        | Brady, Robert A.             | Clement, Job           |
| Becerra, Xavier         | Brown, Corrine               | Clyburn, James E.      |
| Bentsen, Kenneth E. Jr. | Brown, Henry E. Jr.          | Coble, John H.         |
| Bereuter, Douglas K.    | Brown, Sherrod               | Collins, Michael A.    |
| Berkley, Shelley        | Bryant, Edward G.            | Combest, Larry E.      |

## List of House members included in the dataset (cont.)

TABLE A8: Members of Congress included in the study (as legislator-PAC dyads)

|                             |                        |                          |
|-----------------------------|------------------------|--------------------------|
| Condit, Gary A.             | Demint, James W.       | Ferguson, Mike           |
| Conyers, John Jr.           | Deutsch, Peter R.      | Filner, Bob              |
| Cooksey, John C.            | Diaz-Balart, Lincoln   | Flake, Jeff L.           |
| Costello, Jerry F.          | Dicks, Norman D.       | Fletcher, Ernest L.      |
| Cox, Christopher            | Dingell, John D.       | Foley, Mark              |
| Coyne, William J.           | Doggett, Lloyd A.      | Forbes, J. Randy         |
| Cramer, Robert E. “Bud” Jr. | Dooley, Calvin M.      | Ford, Harold Jr.         |
| Crane, Philip M.            | Doolittle, John T.     | Fossella, Vito J. Jr.    |
| Crenshaw, Ander             | Doyle, Mike            | Frank, Barney            |
| Cubin, Barbara L.           | Dreier, David          | Frelinghuysen, Rodney P. |
| Culbertson, John A.         | Duncan, John J. Jr.    | Frost, Jonas M.          |
| Cummings, Elijah E.         | Dunn, Jennifer         | Gallegly, Elton          |
| Cunningham, Randy “Duke”    | Edwards, Chet          | Ganske, John G.          |
| Davis, Danny K.             | Ehlers, Vernon J.      | Gekas, George W.         |
| Davis, James O. III         | Ehrlich, Robert L. Jr. | Gephardt, Richard A.     |
| Davis, Jo Ann S.            | Emerson, Jo Ann H.     | Gibbons, James A.        |
| Davis, Susan A.             | Engel, Eliot L.        | Gilchrest, Wayne T.      |
| Davis, Thomas M. Jr.        | English, Philip        | Gillmor, Paul E.         |
| Deal, Nathan                | Eshoo, Anna G.         | Gilman, Benjamin A.      |
| DeFazio, Peter A.           | Etheridge, Bob         | Gonzalez, Charles A.     |
| Degette, Diana L.           | Evans, Lane A.         | Goode, Virgil H. Jr.     |
| Delahunt, William D.        | Everett, Terry         | Goodlatte, Robert W.     |
| Delauro, Rosa L.            | Farr, Sam              | Gordon, Barton J.        |
| Delay, Thomas D.            | Fattah, Chaka          | Goss, Porter J.          |

## List of House members included in the dataset (cont.)

TABLE A8: Members of Congress included in the study (as legislator-PAC dyads)

|                           |                        |                        |
|---------------------------|------------------------|------------------------|
| Graham, Lindsey O.        | Hinchey, Maurice D.    | Jenkins, William L.    |
| Granger, N. Kay           | Hinojosa, Ruben E.     | John, Chris            |
| Graves, Samuel B. Jr.     | Hobson, David L.       | Johnson, Eddie B.      |
| Green, Mark A.            | Hoeffel, Joseph M.     | Johnson, Nancy L.      |
| Green, Raymond E.         | Hoekstra, Peter        | Johnson, Samuel R.     |
| Greenwood, James C.       | Holden, Tim            | Johnson, Timothy V.    |
| Grucci, Felix J. Jr.      | Holt, Rush D.          | Jones, Stephanie T.    |
| Gutierrez, Luis V.        | Honda, Michael M.      | Jones, Walter B.       |
| Gutknecht, Gilbert W. Jr. | Hooley, Darlene        | Kanjorski, Paul E.     |
| Hall, Ralph M.            | Horn, Steve            | Kaptur, Marcy          |
| Hall, Tony P.             | Hostettler, John N.    | Keller, Richard A.     |
| Hansen, James V.          | Houghton, Amory        | Kelly, Sue N.          |
| Harman, Jane              | Hoyer, Steny H.        | Kennedy, Patrick J.    |
| Hart, Melissa A.          | Hulshof, Kenny C.      | Kerns, Brian           |
| Hastert, J. Dennis        | Hunter, Duncan         | Kildee, Dale E.        |
| Hastings, Alcee L.        | Hutchinson, William A. | Kilpatrick, Carolyn C. |
| Hastings, Doc             | Hyde, Henry J.         | Kind, Ronald J.        |
| Hayes, Robert C.          | Inslee, Jay R.         | King, Peter T.         |
| Hayworth, J. D.           | Isakson, John H.       | Kingston, John H.      |
| Hefley, Joel              | Israel, Steve          | Kirk, Mark S.          |
| Herger, Wally             | Issa, Darrell E.       | Kleczka, Gerald D.     |
| Hill, Baron               | Istook, Ernest J. Jr.  | Knollenberg, Joseph K. |
| Hilleary, W. Van          | Jackson, Jesse Jr.     | Kolbe, James T.        |
| Hilliard, Earl F.         | Jefferson, William J.  | Kucinich, Dennis J.    |

## List of House members included in the dataset (cont.)

TABLE A8: Members of Congress included in the study (as legislator-PAC dyads)

|                       |                       |                             |
|-----------------------|-----------------------|-----------------------------|
| LaFalce, John J.      | Luther, Bill          | Menendez, Robert            |
| LaHood, Ray           | Lynch, Stephen F.     | Mica, John L. Rep.          |
| Lampson, Nicholas     | Maloney, Carolyn B.   | Millender-McDonald, Juanita |
| Langevin, James R.    | Maloney, James H.     | Miller, Dan                 |
| Lantos, Thomas P.     | Manzullo, Donald A.   | Miller, Gary G. Hon.        |
| Largent, Stephen M.   | Markey, Edward J.     | Miller, George              |
| Larsen, Richard R.    | Mascara, Frank        | Miller, Jefferson B.        |
| Larson, John B.       | Matheson, James D.    | Mink, Patsy T.              |
| Latham, Tom           | Matsui, Robert        | Moakley, John J.            |
| Latourette, Steven C. | McCarthy, Carolyn     | Mollohan, Alan B.           |
| Leach, James A.       | McCarthy, Karen       | Moore, Dennis               |
| Lee, Barbara          | McCollum, Betty       | Moran, James P. Jr.         |
| Lee, Sheila J.        | McCrery, James O. III | Moran, Jerry                |
| Levin, Sander         | McDermott, James A.   | Morella, Constance A.       |
| Lewis, Jerry          | McGovern, James P.    | Murtha, John P.             |
| Lewis, John           | McHugh, John M.       | Myrick, Sue                 |
| Lewis, Ron            | McInnis, Scott        | Nadler, Jerrold L.          |
| Linder, John          | McIntyre, Mike        | Napolitano, Grace           |
| Lipinski, William O.  | McKeon, Howard P.     | Neal, Richard E.            |
| Lobiondo, Frank A.    | McKinney, Cynthia A.  | Nethercutt, George R. Jr.   |
| Lofgren, Zoe          | McNulty, Michael R.   | Ney, Robert W.              |
| Lowey, Nita M.        | Meehan, Martin T.     | Northrup, Anne M.           |
| Lucas, Frank D.       | Meek, Carrie          | Norwood, Charles W.         |
| Lucas, Kenneth R.     | Meeks, Gregory W.     | Nussle, Jim                 |

## List of House members included in the dataset (cont.)

TABLE A8: Members of Congress included in the study (as legislator-PAC dyads)

|                                  |                      |                             |
|----------------------------------|----------------------|-----------------------------|
| Oberstar, James L.               | Pomeroy, Earl R.     | Roukema, Marge              |
| Obey, David R.                   | Portman, Rob         | Roybal-Allard, Lucille      |
| Olver, John W.                   | Price, David E.      | Royce, Edward R.            |
| Ortiz, Solomon P.                | Pryce, Deborah       | Rush, Bobby L.              |
| Osborne, Thomas W.               | Putnam, Adam H.      | Ryan, Paul D.               |
| Ose, Doug                        | Quinn, Jack          | Ryun, Jim R.                |
| Otter, C. L. Butch               | Radanovich, George   | Sabo, Martin Olav           |
| Owens, Major Robert O.           | Rahall, Nick J. II   | Sanchez, Loretta            |
| Oxley, Michael G.                | Ramstad, James M.    | Sanders, Bernard            |
| Pallone, Frank Jr.               | Rangel, Charles B.   | Sandlin, Max                |
| Pascrell, William J. Jr.         | Regula, Ralph S.     | Sawyer, Tom                 |
| Pastor, Edward L.                | Rehberg, Dennis R.   | Saxton, H. James            |
| Paul, Ronald E.                  | Reyes, Silvestre     | Scarborough, Charles J.     |
| Payne, Donald M.                 | Reynolds, Thomas M.  | Schaffer, Robert W.         |
| Pelosi, Nancy                    | Riley, Bob           | Schakowsky, Janice D.       |
| Pence, Mike                      | Rivers, Lynn N.      | Schiff, Adam                |
| Peterson, Collin C.              | Rodriguez, Ciro D.   | Schrock, Edward L.          |
| Peterson, John E.                | Roemer, Tim          | Scott, Robert C.            |
| Petri, Thomas E.                 | Rogers, Harold D.    | Sensenbrenner, Frank J. Jr. |
| Phelps, David D.                 | Rogers, Michael J.   | Serrano, Jose E.            |
| Pickering, Charles W. "Chip" Jr. | Rohrabacher, Dana    | Sessions, Pete              |
| Pitts, Joseph R.                 | Ros-Lehtinen, Ileana | Shadegg, John B.            |
| Platts, Todd R.                  | Ross, Michael A.     | Shaw, E. Clay Jr.           |
| Pombo, Richard                   | Rothman, Steven R.   | Shays, Christopher          |



## List of House members included in the dataset (cont.)

TABLE A8: Members of Congress included in the study (as legislator-PAC dyads)

|                        |                         |                           |
|------------------------|-------------------------|---------------------------|
| Sherman, Brad          | Stupak, Bart T.         | Udall, Tom                |
| Sherwood, Donald L.    | Sullivan, John          | Upton, Frederick S.       |
| Shimkus, John M.       | Sununu, John E.         | Velasquez, Nydia M.       |
| Shows, Clifford R.     | Sweeney, John E.        | Visclosky, Peter J.       |
| Shuster, William F.    | Tancredo, Thomas G.     | Vitter, David B.          |
| Simmons, Robert R.     | Tanner, John S.         | Walden, Gregory P.        |
| Simpson, Michael K.    | Tauscher, Ellen O.      | Walsh, James T.           |
| Skeen, Joe             | Tauzin, W. J. Billy     | Wamp, Zach                |
| Skelton, Ike           | Taylor, Charles H.      | Waters, Maxine            |
| Slaughter, Louise M.   | Terry, Lee R.           | Watkins, Wesley W.        |
| Smith, Adam            | Thomas, William M.      | Watson, Diane E.          |
| Smith, Christopher H.  | Thompson, Bennie G.     | Watt, Melvin L.           |
| Smith, Lamar S.        | Thompson, C. Michael    | Watts, Julius C. Jr.      |
| Smith, Nick            | Thornberry, Mac         | Waxman, Henry A.          |
| Snyder, Victor F.      | Thune, John R.          | Weiner, Anthony D.        |
| Solis, Hilda           | Thurman, Karen L.       | Weldon, Dave              |
| Souder, Mark E.        | Tiahrt, W. Todd         | Weldon, W. Curtis         |
| Spence, Floyd D.       | Tiberi, Patrick Joseph  | Weller, Gerald C. "Jerry" |
| Spratt, John McKee Jr. | Tierney, John F.        | Wexler, Robert            |
| Stark, Fortney Pete    | Toomey, Patrick J.      | Whitfield, Ed             |
| Stearns, Clifford B.   | Towns, Edolphus         | Wicker, Roger F.          |
| Stenholm, Charles W.   | Traficant, James A. Jr. | Wilson, Addison G.        |
| Strickland, Ted        | Turner, Jim             | Wilson, Heather A.        |
| Stump, Bob             | Udall, Mark             | Wolf, Frank R.            |

## List of House members included in the dataset (cont.)

TABLE A8: Members of Congress included in the study (as legislator-PAC dyads)

---

|                   |
|-------------------|
| Woolsey, Lynn C.  |
| Wu, David         |
| Wynn, Albert R.   |
| Young, C. W. Bill |
| Young, Don E.     |

---

## List of Senate members included in the dataset

TABLE A9: Senators included in the study (as legislator-PAC dyads)

|                      |                      |                      |
|----------------------|----------------------|----------------------|
| Akaka, Daniel K.     | Conrad, Kent         | Hatch, Orrin G.      |
| Allard, Wayne A.     | Corzine, Jon S.      | Helms, Jesse         |
| Allen, George        | Craig, Larry E.      | Hollings, Ernest F.  |
| Baucus, Max S.       | Crapo, Michael D.    | Hutchinson, Kay B.   |
| Bayh, Evan           | Daschle, Thomas A.   | Inhofe, James M.     |
| Bennett, Robert F.   | Dayton, Mark         | Inouye, Daniel K.    |
| Biden, Joseph R.     | Dewine, Richard M.   | Jeffords, James M.   |
| Bingaman, Jeff       | Dodd, Christopher J. | Johnson, Tim         |
| Bond, Christopher S. | Domenici, Pete V.    | Kennedy, Edward M.   |
| Boxer, Barbara       | Dorgan, Byron L.     | Kerry, John F.       |
| Breaux, John B.      | Durbin, Richard J.   | Kohl, Herb           |
| Brownback, Samuel D. | Edwards, John R.     | Kyl, Jon L.          |
| Bunning, Jim         | Ensign, John E. III  | Landrieu, Mary L.    |
| Burns, Conrad        | Enzi, Michael B.     | Leahy, Patrick       |
| Byrd, Robert C.      | Feingold, Russell D. | Levin, Carl          |
| Campbell, Ben N.     | Feinstein, Dianne    | Lieberman, Joseph I. |
| Cantwell, Maria      | Fitzgerald, Peter G. | Lincoln, Blanche L.  |
| Carnahan, Jean A.    | Frist, William H.    | Lott, Trent C.       |
| Carper, Thomas R.    | Graham, Bob          | Lugar, Richard G.    |
| Chafee, Lincoln D.   | Gramm, Phil          | McCain, John S.      |
| Cleland, Joseph M.   | Grassley, Charles E. | McConnell, Mitch     |
| Clinton, Hillary R.  | Gregg, Judd A.       | Mikulski, Barbara A. |
| Cochran, Thad        | Hagel, Charles T.    | Miller, Zell B.      |
| Collins, Susan M.    | Harkin, Thomas R.    | Murkowski, Frank     |

## List of Senate members included in the dataset (cont.)

TABLE A9: Senators included in the study (as legislator-PAC dyads)

---

|                        |                    |
|------------------------|--------------------|
| Murray, Patty          | Warner, John W.    |
| Nelson, Bill           | Wellstone, Paul D. |
| Nelson, Benjamin E.    | Wyden, Ronald L.   |
| Nickles, Donald L.     |                    |
| Reed, Jack             |                    |
| Reid, Harry            |                    |
| Roberts, Pat           |                    |
| Rockefeller, John D.   |                    |
| Santorum, Richard J.   |                    |
| Sarbanes, Paul S.      |                    |
| Schumer, Charles E.    |                    |
| Sessions, Jefferson B. |                    |
| Shelby, Richard C.     |                    |
| Smith, Gordon H.       |                    |
| Smith, Robert C.       |                    |
| Snowe, Olympia J.      |                    |
| Specter, Arlen         |                    |
| Stabenow, Debbie       |                    |
| Stevens, Theodore F.   |                    |
| Thomas, Craig          |                    |
| Thompson, Fred D.      |                    |
| Thurmond, James S.     |                    |
| Torricelli, Robert G.  |                    |
| Voinovich, George S.   |                    |

---

## List of countries by development status (2013)

TABLE A10: GNI per capita in dollars (World Bank)

| Country          | GNI per capita | Development Status |
|------------------|----------------|--------------------|
| Bermuda          | 104,610        | developed          |
| Norway           | 102,610        | developed          |
| Switzerland      | 90,760         | developed          |
| Qatar            | 86,790         | developed          |
| Luxembourg       | 69,900         | developed          |
| Australia        | 65,390         | developed          |
| Macao SAR, China | 64,050         | developed          |
| Sweden           | 61,760         | developed          |
| Denmark          | 61,680         | developed          |
| Singapore        | 54,040         | developed          |
| United States    | 53,470         | developed          |
| Canada           | 52,200         | developed          |
| Netherlands      | 51,060         | developed          |
| Austria          | 50,430         | developed          |
| Finland          | 48,820         | developed          |
| Germany          | 47,270         | developed          |
| Iceland          | 46,400         | developed          |
| Japan            | 46,330         | developed          |
| Belgium          | 46,290         | developed          |
| Kuwait           | 45,130         | developed          |
| France           | 43,460         | developed          |
| Ireland          | 43,110         | developed          |
| United Kingdom   | 41,680         | developed          |

## List of countries by development status (2013) (cont.)

TABLE A10: GNI per capita in dollars (World Bank)

| Country              | GNI per capita | Development Status |
|----------------------|----------------|--------------------|
| Hong Kong SAR, China | 38,420         | developed          |
| United Arab Emirates | 38,360         | developed          |
| Italy                | 35,860         | developed          |
| New Zealand          | 35,550         | developed          |
| Israel               | 33,930         | developed          |
| Spain                | 29,920         | developed          |
| Saudi Arabia         | 26,260         | developed          |
| Korea, Rep.          | 25,920         | developed          |
| Cyprus               | 25,210         | developed          |
| Oman                 | 25,150         | developed          |
| Slovenia             | 23,210         | developed          |
| Greece               | 22,690         | developed          |
| Bahamas, The         | 21,570         | developed          |
| Portugal             | 21,260         | developed          |
| Malta                | 20,980         | developed          |
| Bahrain              | 19,700         | developed          |
| Puerto Rico          | 19,210         | developed          |
| Czech Republic       | 18,950         | developed          |
| Slovak Republic      | 17,810         | developed          |
| Estonia              | 17,690         | developed          |
| Trinidad and Tobago  | 15,760         | developed          |
| Latvia               | 15,280         | developed          |
| Chile                | 15,230         | developed          |

## List of countries by development status (2013) (cont.)

TABLE A10: GNI per capita in dollars (World Bank)

| Country             | GNI per capita | Development Status              |
|---------------------|----------------|---------------------------------|
| Uruguay             | 15,180         | developed                       |
| Barbados            | 15,080         | developed                       |
| Lithuania           | 14,900         | developed                       |
| Equatorial Guinea   | 14,320         | developed                       |
| St. Kitts and Nevis | 13,890         | developed                       |
| Russian Federation  | 13,850         | developed                       |
| Croatia             | 13,430         | developed                       |
| Hungary             | 13,260         | developed                       |
| Poland              | 13,240         | developed                       |
| Seychelles          | 13,210         | developed                       |
| Antigua and Barbuda | 13,050         | developed                       |
| Venezuela           | 12,550         | developing, upper middle income |
| Brazil              | 11,690         | developing, upper middle income |
| Kazakhstan          | 11,550         | developing, upper middle income |
| Palau               | 10,970         | developing, upper middle income |
| Turkey              | 10,970         | developing, upper middle income |
| Panama              | 10,700         | developing, upper middle income |
| Gabon               | 10,650         | developing, upper middle income |
| Malaysia            | 10,430         | developing, upper middle income |
| Mexico              | 9,940          | developing, upper middle income |
| Lebanon             | 9,870          | developing, upper middle income |
| Costa Rica          | 9,550          | developing, upper middle income |
| Suriname            | 9,370          | developing, upper middle income |

## List of countries by development status (2013) (cont.)

TABLE A10: GNI per capita in dollars (World Bank)

| Country                        | GNI per capita | Development Status              |
|--------------------------------|----------------|---------------------------------|
| Mauritius                      | 9,290          | developing, upper middle income |
| Romania                        | 9,060          | developing, upper middle income |
| Botswana                       | 7,770          | developing, upper middle income |
| Colombia                       | 7,590          | developing, upper middle income |
| Grenada                        | 7,490          | developing, upper middle income |
| Bulgaria                       | 7,360          | developing, upper middle income |
| Azerbaijan                     | 7,350          | developing, upper middle income |
| Montenegro                     | 7,250          | developing, upper middle income |
| South Africa                   | 7,190          | developing, upper middle income |
| St. Lucia                      | 7,060          | developing, upper middle income |
| Dominica                       | 6,930          | developing, upper middle income |
| Turkmenistan                   | 6,880          | developing, upper middle income |
| Belarus                        | 6,730          | developing, upper middle income |
| Iraq                           | 6,720          | developing, upper middle income |
| China                          | 6,560          | developing, upper middle income |
| St. Vincent and the Grenadines | 6,460          | developing, upper middle income |
| Peru                           | 6,270          | developing, upper middle income |
| Serbia                         | 6,050          | developing, upper middle income |
| Cuba                           | 5,890          | developing, upper middle income |
| Namibia                        | 5,870          | developing, upper middle income |
| Tuvalu                         | 5,840          | developing, upper middle income |
| Iran                           | 5,780          | developing, upper middle income |
| Dominican Republic             | 5,770          | developing, upper middle income |



## List of countries by development status (2013) (cont.)

TABLE A10: GNI per capita in dollars (World Bank)

| Country                | GNI per capita | Development Status              |
|------------------------|----------------|---------------------------------|
| Ecuador                | 5,760          | developing, upper middle income |
| Maldives               | 5,600          | developing, upper middle income |
| Thailand               | 5,340          | developing, upper middle income |
| Algeria                | 5,330          | developing, upper middle income |
| Jamaica                | 5,220          | developing, upper middle income |
| Angola                 | 5,170          | developing, upper middle income |
| Jordan                 | 4,950          | developing, upper middle income |
| Macedonia, FYR         | 4,870          | developing, upper middle income |
| Bosnia and Herzegovina | 4,780          | developing, upper middle income |
| Albania                | 4,710          | developing, upper middle income |
| Belize                 | 4,510          | developing, upper middle income |
| Tonga                  | 4,490          | developing, upper middle income |
| Fiji                   | 4,370          | developing, upper middle income |
| Marshall Islands       | 4,310          | developing, upper middle income |
| Tunisia                | 4,200          | developing, upper middle income |
| Paraguay               | 4,010          | developing, lower middle income |
| Samoa                  | 3,970          | developing, lower middle income |
| Ukraine                | 3,960          | developing, lower middle income |
| Timor-Leste            | 3,940          | developing, lower middle income |
| Kosovo                 | 3,940          | developing, lower middle income |
| Armenia                | 3,800          | developing, lower middle income |
| Mongolia               | 3,770          | developing, lower middle income |
| Guyana                 | 3,750          | developing, lower middle income |

## List of countries by development status (2013) (cont.)

TABLE A10: GNI per capita in dollars (World Bank)

| Country                      | GNI per capita | Development Status              |
|------------------------------|----------------|---------------------------------|
| El Salvador                  | 3,720          | developing, lower middle income |
| Cape Verde                   | 3,620          | developing, lower middle income |
| Indonesia                    | 3,580          | developing, lower middle income |
| Georgia                      | 3,570          | developing, lower middle income |
| Guatemala                    | 3,340          | developing, lower middle income |
| Micronesia, Federated States | 3,280          | developing, lower middle income |
| Philippines                  | 3,270          | developing, lower middle income |
| Sri Lanka                    | 3,170          | developing, lower middle income |
| Egypt                        | 3,140          | developing, lower middle income |
| Vanuatu                      | 3,130          | developing, lower middle income |
| West Bank and Gaza           | 3,070          | developing, lower middle income |
| Morocco                      | 3,020          | developing, lower middle income |
| Swaziland                    | 2,990          | developing, lower middle income |
| Nigeria                      | 2,710          | developing, lower middle income |
| Kiribati                     | 2,620          | developing, lower middle income |
| Congo, Rep.                  | 2,590          | developing, lower middle income |
| Bolivia                      | 2,550          | developing, lower middle income |
| Moldova                      | 2,470          | developing, lower middle income |
| Bhutan                       | 2,330          | developing, lower middle income |
| Honduras                     | 2,180          | developing, lower middle income |
| Papua New Guinea             | 2,010          | developing, lower middle income |
| Uzbekistan                   | 1,880          | developing, lower middle income |
| Zambia                       | 1,810          | developing, lower middle income |

## List of countries by development status (2013) (cont.)

TABLE A10: GNI per capita in dollars (World Bank)

| Country               | GNI per capita | Development Status              |
|-----------------------|----------------|---------------------------------|
| Nicaragua             | 1,790          | developing, lower middle income |
| Ghana                 | 1,770          | developing, lower middle income |
| Vietnam               | 1,740          | developing, lower middle income |
| Solomon Islands       | 1,600          | developing, lower middle income |
| India                 | 1,570          | developing, lower middle income |
| Sudan                 | 1,550          | developing, lower middle income |
| Lesotho               | 1,500          | developing, lower middle income |
| Sao Tome and Principe | 1,470          | developing, lower middle income |
| Cote d'Ivoire         | 1,450          | developing, lower middle income |
| Laos                  | 1,450          | developing, lower middle income |
| Pakistan              | 1,360          | developing, lower middle income |
| Yemen                 | 1,330          | developing, lower middle income |
| Cameroon              | 1,290          | developing, lower middle income |
| Kyrgyzstan            | 1,210          | developing, lower middle income |
| Kenya                 | 1,160          | developing, lower middle income |
| Mauritania            | 1,060          | developing, lower middle income |
| Senegal               | 1,050          | developing, lower middle income |
| Chad                  | 1,020          | developing, lower income        |
| Bangladesh            | 1,010          | developing, lower income        |
| Tajikistan            | 990            | developing, lower income        |
| Cambodia              | 950            | developing, lower income        |
| South Sudan           | 950            | developing, lower income        |
| Zimbabwe              | 860            | developing, lower income        |

## List of countries by development status (2013) (cont.)

TABLE A10: GNI per capita in dollars (World Bank)

| Country       | GNI per capita | Development Status       |
|---------------|----------------|--------------------------|
| Comoros       | 840            | developing, lower income |
| Haiti         | 810            | developing, lower income |
| Benin         | 790            | developing, lower income |
| Nepal         | 730            | developing, lower income |
| Afghanistan   | 690            | developing, lower income |
| Burkina Faso  | 670            | developing, lower income |
| Mali          | 670            | developing, lower income |
| Sierra Leone  | 660            | developing, lower income |
| Rwanda        | 630            | developing, lower income |
| Tanzania      | 630            | developing, lower income |
| Mozambique    | 610            | developing, lower income |
| Guinea-Bissau | 590            | developing, lower income |
| Uganda        | 550            | developing, lower income |
| Togo          | 530            | developing, lower income |
| Gambia        | 500            | developing, lower income |
| Eritrea       | 490            | developing, lower income |
| Ethiopia      | 470            | developing, lower income |
| Guinea        | 460            | developing, lower income |
| Madagascar    | 440            | developing, lower income |

## List of countries by development status (2013) (cont.)

TABLE A10: GNI per capita in dollars (World Bank)

| Country                  | GNI per capita | Development Status       |
|--------------------------|----------------|--------------------------|
| Congo, D.R.              | 430            | developing, lower income |
| Liberia                  | 410            | developing, lower income |
| Niger                    | 400            | developing, lower income |
| Central African Republic | 320            | developing, lower income |
| Malawi                   | 270            | developing, lower income |
| Burundi                  | 260            | developing, lower income |
